# Supplementary material for: Where are they from and where are they going?: detecting areas of endemism, distribution patterns and conservation status of the order Spirostreptida in Brazil (Diplopoda, Juliformia)
Source: Research Square preprint supplement (doi:10.21203/rs.3.rs-2306728/v1), 2022-11-26
Supplement: Supplementary file 1 [file 61359efb6a2fda078cce0f4a.xlsx]

## Sheet: VNDM
Values from NDM analysis
	Strict Consensus
Grid	Area	Cells	N° Species scored	Mean score	EI (min. - max.)
1° x 1°	c 1	7	7	0.655	4.58333 - 4.83333
	c 2	5	7	0.663	4.63846 - 4.88846
	c 3	5	6	0.738	3.68889 - 3.93889
	c 4	2	2	1000	2.00000 - 2.25000
	c 5	2	2	1000	2.00000 - 2.25000
	c 6	6	7	0.705	4.93590 - 5.18590
	c 7	4	3	0.688	2.06250 - 2.31250
2° x 2°	c 1	8	4	0.619	2.47500 - 2.72500
	c 2	4	10	0.673	6.72500 - 6.97500
	c 3	2	2	1000	2.00000 - 2.25000
	c 4	4	3	0.792	2.37500 - 2.62500
	c 5	2	2	1000	2.00000 - 2.25000
	c 6	6	3	0.700	2.09848 - 2.34848
3° x 3°	c 1	6	3	0.688	2.06667 - 2.31667
	c 2	5	12	0.686	8.22727 - 8.47727
	c 3	5	3	0.680	2.04000 - 2.29000
	c 4	4	3	0.750	2.25000 - 2.50000
	c 5	6	15	0.646	9.69444 - 9.94444
	c 6	6	14	0.639	8.95000 - 9.20000
	c 7	5	3	0.680	2.04000 - 2.29000
	c 8	7	6	0.633	3.80000 - 4.05000

## Sheet: VNDM species (1)
Values from NDM analysis
Strict Consensus
c #area by grid
Species	1° x 1°	Species	2° x 2°
Cladostreptus castaneus	c 1 = 0.595	Gymnostreptus olivaceus	c 1 = 0.595
Hemigymnostreptus iheringii	c 1 = 0.643	Pseudonannolene leucocephalus	c 1 = 0.625
Pseudonannolene leucocephalus	c 1 = 0.595	Hemigymnostreptus nitens	c 1 = 0.595
Pseudonannolene silvestris	c 1 = 0.536	Pseudonannolene paulista	c 1 = 0.813
Helicogonus princeps	c 1 = 0.643	Cladostreptus castaneus	c 2 = 0.875
Hemigymnostreptus pygidialis	c 1 = 0.786	Gymnostreptus porati	c 2 = 0.450
Pseudonannolene ophiiulus	c 1 = 0.786	Plusioporus cristatus	c 2 = 0.450
Cladostreptus castaneus	c 2 = 0.677	Pseudonannolene maritima	c 2 = 0.750
Hemigymnostreptus iheringii	c 2 = 0.700	Pseudonannolene silvestris	c 2 = 0.600
Pseudonannolene albiventris	c 2 = 0.700	Cladostreptus sebastianus	c 2 = 0.600
Pseudonannolene urbica	c 2 = 0.700	Gymnostreptus Caicarostretpus subsericeus	c 2 = 0.750
Helicogonus princeps	c 2 = 0.700	Pseudonannolene albiventris	c 2 = 0.750
Hemigymnostreptus pygidialis	c 2 = 0.485	Pseudonannolene ophiiulus	c 2 = 0.750
Pseudonannolene ophiiulus	c 2 = 0.677	Pseudonannolene urbica	c 2 = 0.750
Cladostreptus sebastianus	c 3 = 0.389	Orthoporus americanus perpromixus	c 3 = 1.000
Pseudonannolene halophila	c 3 = 0.900	Trichogonostreptus (T.) ternetzi	c 3 = 1.000
Pseudonannolene sebastianus	c 3 = 0.800	Cladostreptus fulvus	c 4 = 0.750
Cladostreptus semicinctus	c 3 = 0.800	Pseudonannolene fontanettiae	c 4 = 0.875
Pseudonannolene maritima	c 3 = 0.800	Cladostreptus perlucens	c 4 = 0.750
Orthoporus americanus perpromixus	c 4 = 1.000	Orthoporus fulvomaculatus	c 5 = 1.000
Trichogonostreptus (T.) ternetzi	c 4 = 1.000	Plusioporus sicki	c 5 = 1.000
Orthoporus fulvomaculatus	c 5 = 1.000	Pseudonannolene callipyge	c 6 = 0.667
Plusioporus sicki	c 5 = 1.000	Pseudonannolene strinatii	c 6 = 0.750
Cladostreptus castaneus	c 6 = 0.635	Pseudonannolene paulista	c 6 = 0.682
Hemigymnostreptus iheringii	c 6 = 0.667
Pseudonannolene albiventris	c 6 = 0.667
Pseudonannolene ophiiulus	c 6 = 0.833
Helicogonus princeps	c 6 = 0.667
Hemigymnostreptus pygidialis	c 6 = 0.833
Pseudonannolene leucocephalus	c 6 = 0.635
Pseudonannolene fontanettiae	c 7 = 0.635
Pseudonannolene sp. 1	c 7 = 0.636
Pseudonannolene rolamossa	c 7 = 0.637

## Sheet: VNDM species (2)
Values from NDM analysis
Strict Consensus
c #area by grid
Species	3° x 3°	Species	3° x 3°
Gymnostreptus acuticollis	c 1 = 0.700	Cladostreptus castaneus	c 6 = 0.667
Pseudonannolene robsoni	c 1 = 0.700	Cladostreptus semicinctus	c 6 = 0.750
Gymnostreptus vagabundus	c 1 = 0.667-0.686	Gymnostreptus olivaceus	c 6 = 0.533
Cladostreptus castaneus	c 2 = 0.700	Gymnostreptus Caicarostretpus subsericeus	c 6 = 0.667
Gymnostreptus semicinctus	c 2 = 0.800	Pseudonannolene halophila	c 6 = 0.833
Gymnostreptus vagabundus	c 2 = 0.445	Pseudonannolene paulista	c 6 = 0.533
Plusioporus cristatus	c 2 = 0.655	Pseudonannolene silvestris	c 6 = 0.533
Pseudonannolene halophila	c 2 = 0.655	Cladostreptus sebastianus	c 6 = 0.667
Pseudonannolene sebastianus	c 2 = 0.800	Gymnostreptus heterogona	c 6 = 0.533
Cladostreptus sebastianus	c 2 = 0.700	Gymnostreptus porati	c 6 = 0.750
Gymnostreptus porati	c 2 = 0.573	Plusioporus cristatus	c 6 = 0.400
Gymnostreptus Caicarostretpus subsericeus	c 2 = 0.700	Pseudonannolene maritima	c 6 = 0.667
Pseudonannolene fontanettiae	c 2 = 0.700	Pseudonannolene sebastianus	c 6 = 0.750
Pseudonannolene robsoni	c 2 = 0.700	Pseudonannolene strinatii	c 6 = 0.667
Pseudonannolene silvestris	c 2 = 0.800	Orthoporus fuscipes	c 7 = 0.700
Orthoporus fuscipes	c 3 = 0.700	Pseudonannolene longicornis	c 7 = 0.640
Pseudonannolene longicornis	c 3 = 0.640	Sooretama aguirrei	c 7 = 0.700
Pseudonannolene fontanettiae	c 3 = 0.700	Gymnostreptus pictus	c 8 = 0.714
Pseudonannolene callipyge	c 4 = 0.750	Plusioporus sicki	c 8 = 0.643
Pseudonannolene strinatii	c 4 = 0.750	Plusioporus salvadorii	c 8 = 0.514
Pseudonannolene inops	c 4 = 0.750	Orthoporus fulvomaculatus	c 8 = 0.643
Cladostreptus castaneus	c 5 = 0.667	Trichogonostreptus (Oreastreptus) mattogrossensis	c 8 = 0.571
Cladostreptus semicinctus	c 5 = 0.750	Pseudonannolene pusilla	c 8 = 0.714
Gymnostreptus olivaceus	c 5 = 0.556
Gymnostreptus vagabundus	c 5 = 0.444
Hemigymnostreptus nitens	c 5 = 0.667
Pseudonannolene halophila	c 5 = 0.625
Pseudonannolene robsoni	c 5 = 0.667
Pseudonannolene silvestris	c 5 = 0.750
Cladostreptus sebastianus	c 5 = 0.667
Gymnostreptus heterogona	c 5 = 0.556
Gymnostreptus porati	c 5 = 0.750
Gymnostreptus Caicarostretpus subsericeus	c 5 = 0.667
Plusioporus cristatus	c 5 = 0.625
Pseudonannolene paulista	c 5 = 0.556
Pseudonannolene sebastianus	c 5 = 0.750
