# Supplementary material for: Where are they from and where are they going?: detecting areas of endemism, distribution patterns and conservation status of the order Spirostreptida in Brazil (Diplopoda, Juliformia)
Source: Research Square preprint supplement (doi:10.21203/rs.3.rs-2306728/v1), 2022-11-26
Supplement: Supplementary file 2 [file c0f7535053613074fcbb6407.xlsx]

## Sheet: Sheet1
Values from PAE
Strict Consensus, equal weights (EW)
Grid	Area	Grids recovered	Species recovered (= synapomorphy)
1° x 1°	a 1	8 - 26	Heteropyge cayennophilus (42); Orthoporus pseudofuscipes (55); Heterostreptus coeruleops (76)
		9 - 20	Orthoporus buffalus (50); Epinannolene paraensis (95)
	a 2	17 - 20	Urostreptus mundurucensis (79); Urostreptus travassosi (83)			N° Species coded =	synap exclusive
		17 - 24	Urostreptus carvalhoi (78); Pseudonannolene leucomelas (103)			Grids recovered =	row - column
		21 - 22	Orthoporus fulvomaculatus (52); Plusioporus sicki (66)
		22 - 22	Orthoporus fulvomaculatus (52); Plusioporus sicki (66)
		24 - 23	Plusioporus testaceus (67); Urostreptus paxillatus (80)
		26 - 17	Orthoporus urucumensis (56); Plusioporus gigliotosi (59)
	a 3	19 - 33	Pseudonannolene anapophysis (89); Pseudonannolene xavieri (125)
	a 4	28 - 27	Gymnostreptus perfidelis (22); Helicogonus princeps (35); Hemigymnostreptus iheringii (36)
		29 - 27	Gymnostreptus perfidelis (22); Helicogonus princeps (35); Hemigymnostreptus iheringii (36); Urostreptus atrobrunneus (77); Pseudonannolene albiventris (86); Pseudonannolene tocaiensis (122)
		29 - 31	Cearostreptus triangulatus (3); Gymnostreptus microps (19); Megagymnostreptus tristis (44); Megagymnostreptus niger (45); Tubostreptus teres (75)
		30 - 28	Gymnostreptus perfidus (23); Gymnostreptus Caicarostreptus subsericeus nitidor (33); Trichogonostreptus (Ptenogonostreptus) fallax (74); Pseudonannolene sebastianus (117); Pseudonannolene sp. 2 (127)
		30 - 29	Gymnostreptus Caicarostreptus roseopygidialis (31); Pseudonannolene mesai (108)
		31 - 28	Cladostreptus thalattophilus (11); Gymnostreptus Caicarostreptus flavipes (29)
