# Supplementary material for: Where are they from and where are they going?: detecting areas of endemism, distribution patterns and conservation status of the order Spirostreptida in Brazil (Diplopoda, Juliformia)
Source: Research Square preprint supplement (doi:10.21203/rs.3.rs-2306728/v1), 2022-11-26
Supplement: Supplementary file 3 [file df966ca799c3e4f3939d3c9f.xlsx]

## Sheet: Infomap
Values from Infomap Bioregions
Bioregion #1
Most common species	Count	Most indicative species	Count
Pseudonannolene tricolor	23	Pseudonannolene ophiiulus	1.26
Plusioporus setiger	21	Pseudonannolene sebastianus	1.26
Gymnostreptus olivaceus	11	Cladostreptus castaneus	1.26
Pseudonannolene halophila	10	Plusioporus cristatus	1.26
Pseudonannolene ophiiulus	9	Pseudonannolene albiventris	1.26
Pseudonannolene urbica	9	Hemigymnostreptus iheringii	1.26
Pseudonannolene sebastianus	7	Gymnostreptus perfidus	1.26
Cladostreptus castaneus	7	Hemigymnostreptus pygidialis	1.26
Pseudonannolene paulista	7	Helicogonus princeps	1.26
Gymnostreptus porati	7	Pseudonannolene sp. 2	1.26
Bioregion #2
Most common species	Count	Most indicative species	Count
Trichogonostreptus (Oreastreptus) mattogrossensis	3	Plusioporus sicki	9.67
Pseudonannolene robsoni	3	Orthoporus fulvomaculatus	9.67
Plusioporus sicki	2	Plusioporus minor	9.67
Plusioporus salvadorii	2	Plusioporus gigliotosi	9.67
Orthoporus fulvomaculatus	2	Orthoporus urucumensis	9.67
Pseudonannolene occidentalis	2	Nanostreptus libertinus	9.67
Heteropyge paraguayensis	2	Trichogonostreptus (Oreastreptus) mattogrossensis	7.25
Orthoporus americanus perpromixus	1	Plusioporus salvadorii	6.44
Plusioporus minor	1	Heteropyge paraguayensis	6.44
Trichogonostreptus (Trichogonostreptus) ternetzi	1	Heteropyge araguayensis	4.83
Bioregion #3
Most common species	Count	Most indicative species	Count
Calathostreptus fulvus	4	Calathostreptus fulvus	7.25
Heteropyge bidens	4	Pseudonannolene sp. 5	7.25
Pseudonannolene rolamossa	3	Tubostreptus teres	7.25
Pseudonannolene longicornis	3	Plusioporus unciger	7.25
Gymnostreptus vulgatus	3	Orthoporus ligulifer	7.25
Gymnostreptus acuticollis	2	Megagymnostreptus niger	7.25
Helicogonus generalensis	1	Megagymnostreptus tristis	7.25
Cearostreptus schubarti	1	Gymnostreptus microps	7.25
Gymnostreptus microps	1	Cearostreptus schubarti	7.25
Gymnostreptus porati	1	Calathostreptus fluminensis	7.25
Bioregion #4
Most common species	Count	Most indicative species	Count
Pseudonannolene microzoporus	13	Pseudonannolene erikae	2.23
Pseudonannolene erikae	5	Pseudonannolene leopoldoi	2.23
Pseudonannolene longicornis	3	Pseudonannolene lundi	2.23
Pseudonannolene leopoldoi	2	Pseudonannolene microzoporus	1.53
Pseudonannolene fontanettiae	1	Pseudonannolene sp. 1	1.12
Pseudonannolene lundi	1	Helicogonus generalensis	1.12
Helicogonus generalensis	1	Pseudonannolene longicornis	0.837
Pseudonannolene sp. 1	1	Pseudonannolene fontanettiae	0.558
Bioregion #5
Most common species	Count	Most indicative species	Count
Pseudonannolene strinatii	8	Pseudonannolene strinatii	3.63
Pseudonannolene callipyge	2	Pseudonannolene callipyge	3.63
Cladostreptus sebastianus	1	Pseudonannolene sp. 6	3.63
Cladostreptus sanctus	1	Pseudonannolene caulleryi	3.63
Gymnostreptus vulgatus	1	Cladostreptus sanctus	1.81
Gymnostreptus vagabundus	1	Pseudonannolene inops	0.906
Gymnostreptus Caicarostreptus subsericeus	1	Gymnostreptus Caicarostreptus subsericeus	0.906
Pseudonannolene caulleryi	1	Gymnostreptus vagabundus	0.906
Pseudonannolene inops	1	Gymnostreptus vulgatus	0.906
Pseudonannolene silvestris	1	Pseudonannolene silvestris	0.725
Bioregion #6
Most common species	Count	Most indicative species	Count
Pseudonannolene imbirensis	7	Pseudonannolene imbirensis	4.14
Pseudonannolene caatinga	2	Gymnostreptus goyanus	4.14
Gymnostreptus goyanus	2	Pseudonannolene curtipes	4.14
Orthoporus fuscipes	1	Plusioporus pandeirus	4.14
Pseudonannolene curtipes	1	Orthoporus fuscipes	2.07
Plusioporus pandeirus	1	Pseudonannolene caatinga	0.829
Pseudonannolene microzoporus	1	Pseudonannolene microzoporus	0.218
Bioregion #7
Most common species	Count	Most indicative species	Count
Pseudonannolene robsoni	25	Pseudonannolene ambuatinga	1.16
Pseudonannolene microzoporus	4	Pseudonannolene robsoni	1
Pseudonannolene ambuatinga	3	Pseudonannolene fontanettiae	0.87
Pseudonannolene fontanettiae	3	Pseudonannolene rolamossa	0.29
Pseudonannolene rolamossa	1	Pseudonannolene microzoporus	0.244
Bioregion #8
Most common species	Count	Most indicative species	Count
Pseudonannolene halophila	9	Pseudonannolene maritima	3.22
Pseudonannolene maritima	4	Gymnostreptus Caicarostreptus flavipes	3.22
Cladostreptus sebastianus	3	Cladostreptus thalattophilus	3.22
Cladostreptus thalattophilus	1	Pseudonannolene halophila	1.53
Gymnostreptus Caicarostreptus flavipes	1	Cladostreptus sebastianus	1.38
